# Supplementary material for: Family involvement and patient-experienced improvement and satisfaction with care: a nationwide cross-sectional study in Danish psychiatric hospitals
Source: Springer Nature journal article supplement (doi:10.1186/s12888-021-03179-1), 2021-04-13

## Additional file 1. Flowchart

Figure 1. Outpatient care (adult psychiatric patients)

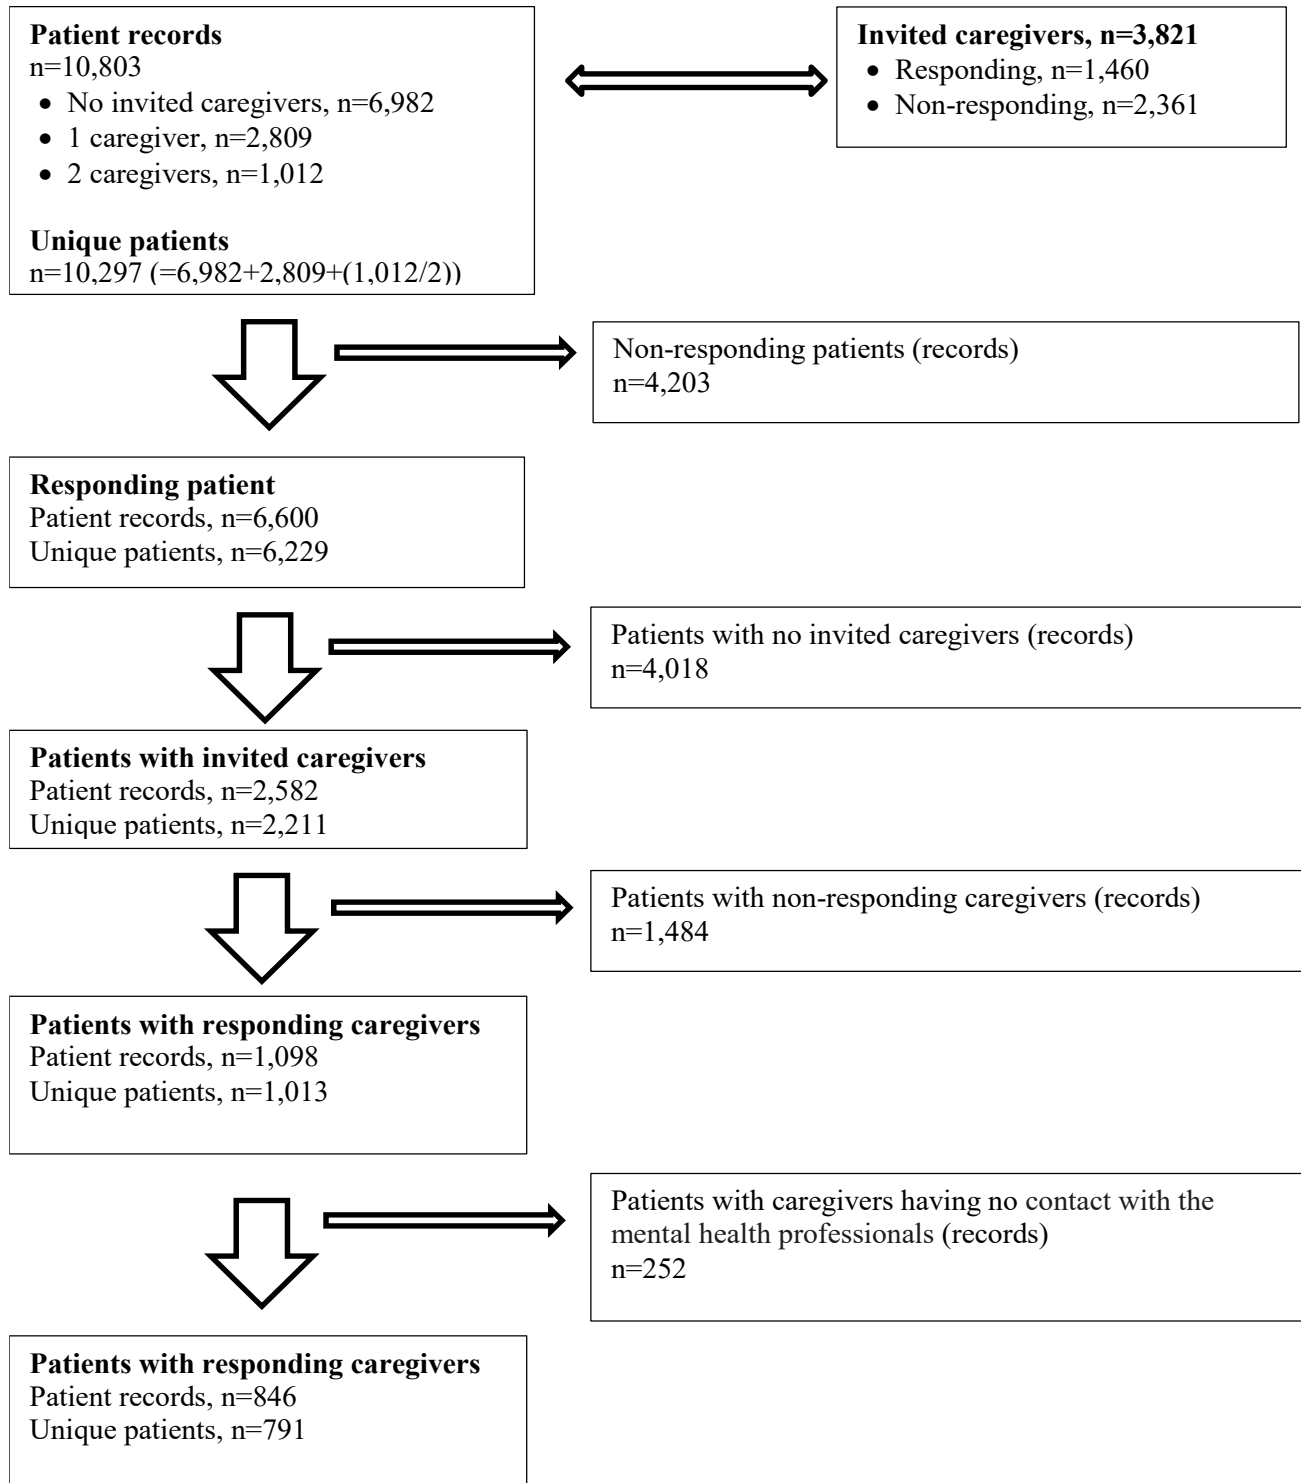

**Figure 2. Inpatient care (adult psychiatric patients)**

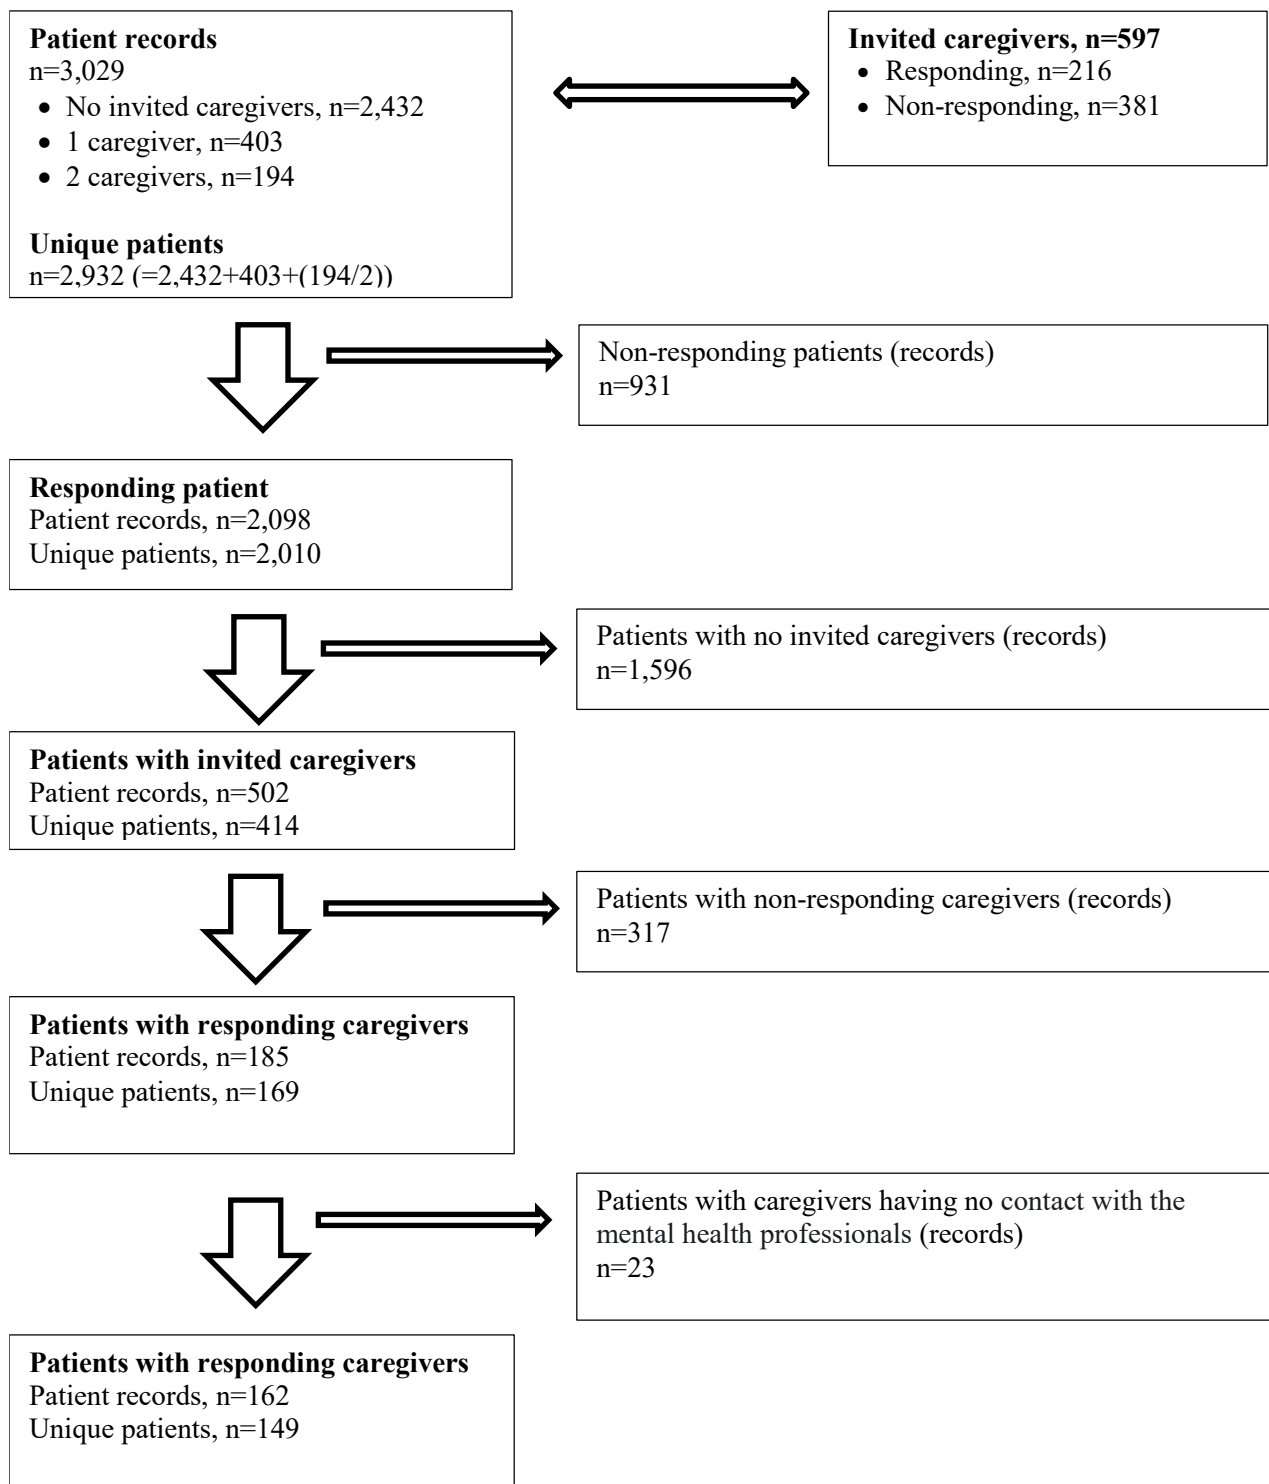

Supplement: MOESM1 [file 19069684]
