# Supplementary material for: Family involvement and patient-experienced improvement and satisfaction with care: a nationwide cross-sectional study in Danish psychiatric hospitals
Source: Springer Nature journal article supplement (doi:10.1186/s12888-021-03179-1), 2021-04-13
Supplement: MOESM2 [file 19069684]

## Additional file 2. Descriptive data about caregiver involvement

**Table. Descriptive data about caregiver involvement**

| Caregiver involvement                                                  | Outpatient care, n=846 | Inpatient care, n=162 |
|------------------------------------------------------------------------|------------------------|-----------------------|
| <b>Staff supports patient in having contact with caregivers, n (%)</b> |                        |                       |
| Not at all                                                             | 26 (3.1)               | 7 (4.3)               |
| Low degree                                                             | 33 (3.9)               | 10 (6.2)              |
| Some degree                                                            | 114 (13.5)             | 29 (17.9)             |
| High degree                                                            | 268 (31.7)             | 45 (27.8)             |
| Very high degree                                                       | 278 (32.9)             | 43 (26.5)             |
| Not relevant                                                           | 27 (3.2)               | 2 (1.2)               |
| Unknown                                                                | 100 (11.8)             | 26 (16.1)             |
| <b>Sufficient information about disease and treatment, n (%)</b>       |                        |                       |
| Not at all                                                             | 122 (14.4)             | 30 (18.5)             |
| Low degree                                                             | 113 (13.4)             | 25 (15.4)             |
| Some degree                                                            | 200 (23.6)             | 50 (30.9)             |
| High degree                                                            | 204 (24.1)             | 33 (20.4)             |
| Very high degree                                                       | 134 (15.8)             | 16 (9.9)              |
| Not relevant                                                           | 30 (3.6)               | 1 (0.6)               |
| Unknown                                                                | 43 (5.1)               | 7 (4.3)               |
| <b>Talk to staff about expectations, n (%)</b>                         |                        |                       |
| Not at all                                                             | 267 (31.6)             | 51 (31.5)             |
| Low degree                                                             | 124 (14.7)             | 22 (13.6)             |
| Some degree                                                            | 177 (20.9)             | 44 (27.2)             |
| High degree                                                            | 90 (10.6)              | 20 (12.4)             |
| Very high degree                                                       | 37 (4.4)               | 6 (3.7)               |
| Not relevant                                                           | 83 (9.8)               | 8 (4.9)               |
| Unknown                                                                | 68 (8.0)               | 11 (6.8)              |
| <b>Staff asks about your experiences, n (%)</b>                        |                        |                       |
| Not at all                                                             | 204 (24.1)             | 38 (23.5)             |
| Low degree                                                             | 93 (11.0)              | 25 (15.4)             |
| Some degree                                                            | 204 (24.1)             | 51 (31.5)             |
| High degree                                                            | 161 (19.0)             | 27 (16.7)             |
| Very high degree                                                       | 108 (12.8)             | 14 (8.6)              |
| Not relevant                                                           | 38 (4.5)               | 1 (0.6)               |
| Unknown                                                                | 38 (4.5)               | 6 (3.7)               |
| <b>Sufficiently involved in decision making, n (%)</b>                 |                        |                       |
| No                                                                     | 261 (30.9)             | 61 (37.7)             |
| Yes                                                                    | 288 (34.0)             | 57 (35.2)             |
| Not relevant                                                           | 221 (26.1)             | 34 (21.0)             |
| Unknown                                                                | 76 (9.0)               | 10 (6.2)              |
