# Supplementary material for: Family involvement and patient-experienced improvement and satisfaction with care: a nationwide cross-sectional study in Danish psychiatric hospitals
Source: Springer Nature journal article supplement (doi:10.1186/s12888-021-03179-1), 2021-04-13
Supplement: MOESM3 [file 19069684]

### Additional file 3. Results of a sensitivity analysis evaluating potential regional differences

**Table 1a. Descriptive characteristics of patients in Danish psychiatric hospitals (1008 patient records, 940 patients): incl. region**

| Characteristics               | Patient-reported improvement <sup>a</sup> |             |                |              | Patient-reported satisfaction <sup>b</sup> |             |                |             |
|-------------------------------|-------------------------------------------|-------------|----------------|--------------|--------------------------------------------|-------------|----------------|-------------|
|                               | Outpatient care                           |             | Inpatient care |              | Outpatient care                            |             | Inpatient care |             |
|                               | High, n=514                               | Low, n=286  | High, n=106    | Low, n=47    | High, n= 712                               | Low, n=112  | High, n=107    | Low, n=45   |
| <b>Age, m (sd)</b>            | 37.2 (17.1)                               | 38.6 (17.8) | 48.8 ( 19.4)   | 40.6 ( 17.7) | 37.3 (17.1)                                | 37.8 (18.1) | 48.5 (20.0)    | 42.3 (16.8) |
| Age missing, n (%)            | 7 (1.4)                                   | 3 (1.0)     | 1 (0.9)        | 0 (0)        | 8 (1.1)                                    | 1 (0.9)     | 1 (0.9)        | 1 (2.2)     |
| <b>Sex, n (%)</b>             |                                           |             |                |              |                                            |             |                |             |
| Male                          | 201 (39.1)                                | 87 (30.4)   | 46 (43.4)      | 20 (42.6)    | 262 (36.8)                                 | 37 (33.0)   | 45 (42.1)      | 19 (42.2)   |
| Female                        | 306 (59.5)                                | 194 (67.8)  | 54 (50.9)      | 26 (55.3)    | 438 (61.5)                                 | 74 (66.1)   | 56 (52.3)      | 25 (55.6)   |
| Missing                       | 7 (1.4)                                   | 5 (1.8)     | 6 (5.7)        | 1 (2.1)      | 12 (1.7)                                   | 1 (0.9)     | 6 (5.6)        | 1 (2.2)     |
| <b>Diagnosis, n (%)</b>       |                                           |             |                |              |                                            |             |                |             |
| Schizophrenia and psychosis   | 238 (46.3)                                | 85 (29.7)   | 23 (21.7)      | 11 (23.4)    | 297 (41.7)                                 | 34 (30.4)   | 22 (20.6)      | 10 (22.2)   |
| Affective disorder            | 130 (25.3)                                | 68 (23.8)   | 57 (53.8)      | 14 (29.8)    | 178 (25.0)                                 | 23 (20.5)   | 56 (52.3)      | 17 (37.8)   |
| Other diagnosis <sup>c</sup>  | 138 (26.9)                                | 128 (44.8)  | 24 (22.6)      | 21 (44.7)    | 225 (31.6)                                 | 54 (48.2)   | 26 (24.3)      | 17 (37.8)   |
| Missing                       | 8 (1.6)                                   | 5 (1.8)     | 2 (1.9)        | 1 (2.1)      | 12 (1.7)                                   | 1 (0.9)     | 3 (2.8)        | 1 (2.2)     |
| <b>Relative in PPE, n (%)</b> |                                           |             |                |              |                                            |             |                |             |
| Partner                       | 161 (31.3)                                | 100 (35.0)  | 42 (39.6)      | 13 (27.7)    | 233 (32.7)                                 | 32 (28.6)   | 37 (34.6)      | 16 (35.6)   |
| Parent                        | 269 (52.3)                                | 138 (48.3)  | 33 (31.1)      | 21 (44.7)    | 364 (51.1)                                 | 58 (51.8)   | 36 (33.6)      | 17 (37.8)   |
| Son/daughter                  | 41 (8.0)                                  | 29 (10.1)   | 23 (21.7)      | 8 (17.0)     | 55 (7.7)                                   | 14 (12.5)   | 26 (24.3)      | 7 (15.6)    |
| Sibling                       | 18 (3.5)                                  | 9 (3.2)     | 2 (1.9)        | 2 (4.3)      | 24 (3.4)                                   | 5 (4.5)     | 2 (1.9)        | 2 (4.4)     |
| Other relation                | 25 (4.9)                                  | 9 (3.2)     | 6 (5.7)        | 2 (4.3)      | 35 (4.9)                                   | 3 (2.7)     | 6 (5.6)        | 2 (4.4)     |
| Missing                       | 0 (0)                                     | 1 (0.4)     | 0 (0)          | 1 (2.1)      | 1 (0.1)                                    | 0 (0)       | 0 (0)          | 1 (2.2)     |
| <b>Region, n (%)</b>          |                                           |             |                |              |                                            |             |                |             |
| Capital Region of Denmark     | 100 (19.5)                                | 48 (16.8)   | 30 (28.3)      | 9 (19.2)     | 140 (19.7)                                 | 19 (17.0)   | 30 (28.0)      | 8 (17.8)    |
| Central Denmark Region        | 113 (22.0)                                | 64 (22.4)   | 32 (30.2)      | 13 (27.7)    | 151 (21.2)                                 | 29 (25.9)   | 32 (29.9)      | 11 (24.4)   |

|                            |            |           |           |           |            |           |           |           |
|----------------------------|------------|-----------|-----------|-----------|------------|-----------|-----------|-----------|
| North Denmark Region       | 57 (11.1)  | 37 (12.9) | 14 (13.2) | 4 (8.5)   | 83 (11.7)  | 15 (13.4) | 14 (13.1) | 6 (13.3)  |
| Region Zealand             | 46 (9.0)   | 42 (14.7) | 9 (8.5)   | 3 (6.4)   | 67 (9.4)   | 22 (19.6) | 8 (7.5)   | 3 (6.7)   |
| Region of Southern Denmark | 198 (38.5) | 95 (33.2) | 21 (19.8) | 18 (38.3) | 271 (38.1) | 27 (24.1) | 23 (21.5) | 17 (37.8) |
| Missing                    | 0 (0)      | 0 (0)     | 0 (0)     | 0 (0)     | 0 (0)      | 0 (0)     | 0 (0)     | 0 (0)     |

<sup>a</sup> Patient-reported improvement, missing data: n=46 (5,4 %, outpatient), n= 9 (5,6 %, inpatient)

<sup>b</sup> Patient-reported satisfaction, missing data: n= 22 (2,6 %, outpatient), n=10 (6,1%, inpatient)

<sup>c</sup> Organic mental disorders, mental and behavioural disorders due to psychoactive substance use, neurotic, stress-related and somatoform disorders, behavioural syndromes associated with physiological disturbances and physical factors, disorders of adult personality and behavior, and other disorder/symptom (e.g. unclear diagnosis).

**Additional table 1b. Association between caregiver involvement and patient-reported improvement: incl. region**

| Caregiver involvement                                    | Outpatient care: high patient-reported improvement |                       |                                       | Inpatient care: high patient-reported improvement |                       |                                       |
|----------------------------------------------------------|----------------------------------------------------|-----------------------|---------------------------------------|---------------------------------------------------|-----------------------|---------------------------------------|
|                                                          | n (%)                                              | Crude OR<br>(95 % CI) | Adjusted OR<br>(95 % CI) <sup>a</sup> | n (%)                                             | Crude OR<br>(95 % CI) | Adjusted OR<br>(95 % CI) <sup>a</sup> |
| Staff supports patient in having contact with caregivers |                                                    |                       |                                       |                                                   |                       |                                       |
| - High                                                   | 360 (69.1)                                         | 2.10 (1.46-3.04)      | 2.22 (1.50-3.26)                      | 65 (76.5)                                         | 2.34 (1.02-5.36)      | 2.37 (0.89-6.32)                      |
| - Low/none                                               | 84 (51.5)                                          | Reference             | Reference                             | 25 (58.1)                                         | Reference             | Reference                             |
| Sufficient information about disease and treatment       |                                                    |                       |                                       |                                                   |                       |                                       |
| - High                                                   | 233 (71.9)                                         | 1.88 (1.36-2.58)      | 1.75 (1.23-2.48)                      | 36 (80.0)                                         | 2.25 (0.99-5.13)      | 2.31 (0.86-6.23)                      |
| - Low/none                                               | 236 (57.7)                                         | Reference             | Reference                             | 64 (64.0)                                         | Reference             | Reference                             |
| Talk to staff about expectations                         |                                                    |                       |                                       |                                                   |                       |                                       |
| - High                                                   | 85 (71.4)                                          | 1.57 (1.00-2.47)      | 1.42 (0.86-2.33)                      | 17 (68.0)                                         | 1.03 (0.40-2.67)      | 1.24 (0.42-3.68)                      |
| - Low/none                                               | 331 (61.4)                                         | Reference             | Reference                             | 74 (67.3)                                         | Reference             | Reference                             |
| Staff ask about your experiences                         |                                                    |                       |                                       |                                                   |                       |                                       |
| - High                                                   | 187 (73.1)                                         | 1.97 (1.40-2.76)      | 1.78 (1.24-2.54)                      | 31 (81.6)                                         | 2.50 (0.92-6.83)      | 2.96 (0.83-10.56)                     |
| - Low/none                                               | 274 (57.9)                                         | Reference             | Reference                             | 69 (63.9)                                         | Reference             | Reference                             |
| Sufficiently involved in decision making                 |                                                    |                       |                                       |                                                   |                       |                                       |
| - Yes                                                    | 185 (70.1)                                         | 1.94 (1.33-2.82)      | 1.93 (1.28-2.90)                      | 43 (81.1)                                         | 4.01 (1.69-9.51)      | 3.56 (1.33-9.57)                      |
| - No                                                     | 140 (54.7)                                         | Reference             | Reference                             | 30 (51.7)                                         | Reference             | Reference                             |

<sup>a</sup> Adjusted for patient age, sex, diagnosis and region.

**Additional table 1c. Association between caregiver involvement and patient-reported satisfaction with care: incl. region**

| Caregiver involvement                                    | Outpatient care: high patient-reported satisfaction |                       |                                       | Inpatient care: high patient-reported satisfaction |                       |                                       |
|----------------------------------------------------------|-----------------------------------------------------|-----------------------|---------------------------------------|----------------------------------------------------|-----------------------|---------------------------------------|
|                                                          | n (%)                                               | Crude OR<br>(95 % CI) | Adjusted OR<br>(95 % CI) <sup>a</sup> | n (%)                                              | Crude OR<br>(95 % CI) | Adjusted OR<br>(95 % CI) <sup>a</sup> |
| Staff supports patient in having contact with caregivers |                                                     |                       |                                       |                                                    |                       |                                       |
| - High                                                   | 490 (91.6)                                          | 3.75 (2.32-6.06)      | 4.23 (2.57-6.96)                      | 64 (76.1)                                          | 2.53 (1.10-5.81)      | 3.44 (1.23-9.64)                      |
| - Low/none                                               | 125 (74.4)                                          | Reference             | Reference                             | 24 (55.8)                                          | Reference             | Reference                             |
| Sufficient information about disease and treatment       |                                                     |                       |                                       |                                                    |                       |                                       |
| - High                                                   | 303 (92.7)                                          | 2.85 (1.73-4.70)      | 2.77 (1.65-4.63)                      | 38 (82.6)                                          | 2.76 (1.18-6.45)      | 2.80 (1.09-7.21)                      |
| - Low/none                                               | 350 (81.5)                                          | Reference             | Reference                             | 62 (63.3)                                          | Reference             | Reference                             |
| Talk to staff about expectations                         |                                                     |                       |                                       |                                                    |                       |                                       |
| - High                                                   | 112 (90.3)                                          | 1.70 (0.86-3.38)      | 1.71 (0.83-3.54)                      | 18 (69.2)                                          | 1.06 (0.41-2.73)      | 0.97 (0.35-2.65)                      |
| - Low/none                                               | 471 (84.6)                                          | Reference             | Reference                             | 74 (67.9)                                          | Reference             | Reference                             |
| Staff ask about your experiences                         |                                                     |                       |                                       |                                                    |                       |                                       |
| - High                                                   | 240 (92.7)                                          | 2.59 (1.50-4.48)      | 2.44 (1.39-4.28)                      | 33 (84.6)                                          | 3.20 (1.09-9.36)      | 3.91 (1.24-12.26)                     |
| - Low/none                                               | 409 (83.0)                                          | Reference             | Reference                             | 67 (63.2)                                          | Reference             | Reference                             |
| Sufficiently involved in decision making                 |                                                     |                       |                                       |                                                    |                       |                                       |
| - Yes                                                    | 244 (89.1)                                          | 1.80 (1.06-3.06)      | 1.68 (0.95-2.97)                      | 45 (81.8)                                          | 4.03 (1.70-9.56)      | 3.56 (1.37-9.23)                      |
| - No                                                     | 212 (81.9)                                          | Reference             | Reference                             | 29 (52.7)                                          | Reference             | Reference                             |

<sup>a</sup> Adjusted for patient age, sex, diagnosis and region.
