# Supplementary material for: Family involvement and patient-experienced improvement and satisfaction with care: a nationwide cross-sectional study in Danish psychiatric hospitals
Source: Springer Nature journal article supplement (doi:10.1186/s12888-021-03179-1), 2021-04-13
Supplement: MOESM4 [file 19069684]

**Additional file 4. Results of a sensitivity analysis according to non-appointed, non-responding and responding caregivers (outpatients)**

Table.

**Outpatient psychiatric care: descriptive characteristics for 6229 patients<sup>a</sup> according to caregiver participation**

| <b>Patient characteristics<br/>n=6229 (100 %)</b> | <b>No invited caregivers<br/>n = 4018 (64.5 %)</b> | <b>Responding caregivers<br/>n = 945 (15.2 %)</b> | <b>Non-responding<br/>caregivers<br/>n = 1266 (20.3 %)</b> |
|---------------------------------------------------|----------------------------------------------------|---------------------------------------------------|------------------------------------------------------------|
| <b>Age, m (sd)</b>                                | 40.3 (15.7)                                        | 38.9 (17.7)                                       | 37.7 (15.9)                                                |
| Age missing, n (%)                                | 160 (4)                                            | 13 (1)                                            | 28 (2)                                                     |
| <b>Sex, n (%)</b>                                 |                                                    |                                                   |                                                            |
| Male                                              | 1422 (35)                                          | 335 (35)                                          | 407 (32)                                                   |
| Female                                            | 2455 (61)                                          | 596 (63)                                          | 838 (66)                                                   |
| Missing                                           | 141 (4)                                            | 14 (1)                                            | 21 (2)                                                     |
| <b>Diagnosis, n (%)</b>                           |                                                    |                                                   |                                                            |
| Schizophrenia and psychosis                       | 1185 (29)                                          | 340 (36)                                          | 418 (33)                                                   |
| Affective disorder                                | 866 (22)                                           | 247 (26)                                          | 334 (26)                                                   |
| Other diagnosis                                   | 1628 (41)                                          | 342 (36)                                          | 489 (39)                                                   |
| Missing                                           | 339 (8)                                            | 16 (2)                                            | 25 (2)                                                     |
| <b>Relationship, n (%)</b>                        |                                                    |                                                   |                                                            |
| Partner                                           |                                                    | 342 (36)                                          | 518 (41)                                                   |
| Parent                                            |                                                    | 429 (45)                                          | 461 (36)                                                   |
| Son/daughter                                      |                                                    | 92 (10)                                           | 69 (5)                                                     |
| Sibling                                           |                                                    | 32 (3)                                            | 50 (4)                                                     |
| Other relation                                    |                                                    | 48 (5)                                            | 82 (6)                                                     |
| Missing                                           |                                                    | 2 (0)                                             | 86 (7)                                                     |
| <b>Patient-reported<br/>improvement, n (%)</b>    |                                                    |                                                   |                                                            |
| Low/none                                          | 1483 (37)                                          | 320 (34)                                          | 481 (38)                                                   |
| High                                              | 2132 (53)                                          | 564 (60)                                          | 679 (54)                                                   |
| Missing                                           | 403 (10)                                           | 61 (6)                                            | 106 (8)                                                    |
| <b>Patient-reported<br/>satisfaction, n (%)</b>   |                                                    |                                                   |                                                            |
| Low/none                                          | 685 (17)                                           | 129 (14)                                          | 177 (14)                                                   |
| High                                              | 3152 (78)                                          | 789 (83)                                          | 1045 (83)                                                  |
| Missing                                           | 181 (5)                                            | 27 (3)                                            | 44 (3)                                                     |

<sup>a</sup> Patients are only included with one observation disregarding that the patients may have two caregivers responding to the caregiver-questionnaire.
