# Supplementary material for: Family involvement and patient-experienced improvement and satisfaction with care: a nationwide cross-sectional study in Danish psychiatric hospitals
Source: Springer Nature journal article supplement (doi:10.1186/s12888-021-03179-1), 2021-04-13
Supplement: MOESM5 [file 19069684]

**Additional file 5. Results of a sensitivity analysis according to non-appointed, non-responding and responding caregivers (inpatients)**

**Table. Inpatient psychiatric care: descriptive characteristics for 2010 patients<sup>a</sup> according to caregiver participation**

| <b>Patient characteristics<br/>n=2010 (100 %)</b> | <b>No invited caregivers<br/>n = 1596 (79.4 %)</b> | <b>Responding caregivers<br/>n =155 (7.7 %)</b> | <b>Non-responding<br/>caregivers<br/>n = 259 (12.9 %)</b> |
|---------------------------------------------------|----------------------------------------------------|-------------------------------------------------|-----------------------------------------------------------|
| <b>Age, m (sd)</b>                                | 42.4 (16.4)                                        | 46.5 (19.4)                                     | 42.1 (17.7)                                               |
| Age missing, n (%)                                | 136 (9)                                            | 2 (1)                                           | 9 (3)                                                     |
| <b>Sex, n (%)</b>                                 |                                                    |                                                 |                                                           |
| Male                                              | 736 (46)                                           | 66 (43)                                         | 90 (35)                                                   |
| Female                                            | 748 (47)                                           | 84 (54)                                         | 155 (60)                                                  |
| Missing                                           | 112 (7)                                            | 5 (3)                                           | 14 (5)                                                    |
| <b>Diagnosis, n (%)</b>                           |                                                    |                                                 |                                                           |
| Schizophrenia and psychosis                       | 521 (33)                                           | 35 (23)                                         | 59 (23)                                                   |
| Affective disorder                                | 297 (19)                                           | 67 (43)                                         | 87 (34)                                                   |
| Other diagnosis                                   | 535 (34)                                           | 48 (31)                                         | 98 (38)                                                   |
| Missing                                           | 243 (15)                                           | 5 (3)                                           | 15 (6)                                                    |
| <b>Relationship, n (%)</b>                        |                                                    |                                                 |                                                           |
| Partner                                           |                                                    | 58 (37)                                         | 72 (28)                                                   |
| Parent                                            |                                                    | 54 (35)                                         | 87 (34)                                                   |
| Son/daughter                                      |                                                    | 28 (18)                                         | 35 (14)                                                   |
| Sibling                                           |                                                    | 4 (3)                                           | 25 (10)                                                   |
| Other relation                                    |                                                    | 10 (6)                                          | 18 (7)                                                    |
| Missing                                           |                                                    | 1 (1)                                           | 22 (8)                                                    |
| <b>Patient-reported<br/>improvement, n (%)</b>    |                                                    |                                                 |                                                           |
| Low/none                                          | 499 (31)                                           | 49 (32)                                         | 73 (28)                                                   |
| High                                              | 915 (57)                                           | 96 (62)                                         | 161 (62)                                                  |
| Missing                                           | 182 (11)                                           | 10 (6)                                          | 25 (10)                                                   |
| <b>Patient-reported<br/>satisfaction, n (%)</b>   |                                                    |                                                 |                                                           |
| Low/none                                          | 396 (25)                                           | 44 (28)                                         | 54 (21)                                                   |
| High                                              | 1031 (65)                                          | 101 (65)                                        | 189 (73)                                                  |
| Missing                                           | 169 (11)                                           | 10 (6)                                          | 16 (6)                                                    |

<sup>a</sup> Patients are only included with one observation disregarding that the patients may have two caregivers responding to the caregiver-questionnaire.
